# Supplementary material
Source: Royal Society of Chemistry journal article supplement (doi:10.1039/b102754a), 2001-09-20
Supplement: b102754a.pdf [file b102754a.pdf]

Proofs to Professor D. O'Hare, address given below:

**Preferential Anion Exchange Intercalation of Pyridinecarboxylates  
and Toluates Isomers in the Layered Double Hydroxide**

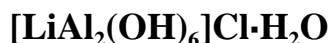

Lixu Lei, R. Prasad Vijayan and Dermot O'Hare\*

*Inorganic Chemistry Laboratory, South Parks Road, Oxford, UK OX1 3QR.*

*Email: dermot.ohare@chem.ox.ac.uk*

**SUPPLEMENTARY DATA**

**Appendix: XRD patterns of the intercalation compounds:**

Compound:  $\text{LiAl}_2(\text{OH})_6\cdot(2\text{-PA})\cdot 0.6\text{Al}(\text{OH})_3\cdot 2.5\text{H}_2\text{O}$

Cell: 5.0800 5.0800 30.2298 90.000 90.000 120.000

Space group: P63/M

Wavelength: 1.54180

| N  | h | k | l  | 2Thobs | 2Thcalc | Dif   | Iobs  | Explanation |
|----|---|---|----|--------|---------|-------|-------|-------------|
| 1  | 0 | 0 | 2  | 5.91   | 5.85    | 0.06  | 100.0 |             |
| 2  | 0 | 0 | 4  | 11.72  | 11.71   | 0.01  | 89.1  |             |
| 3  | 0 | 0 | 6  | 17.60  | 17.60   | 0.00  | 51.6  |             |
| 4  |   |   |    | 18.27  |         |       | 34.7  | Gibbsite    |
| 5  | 0 | 1 | 1  | 20.34  | 20.40   | -0.06 | 10.1  |             |
| 6  | 0 | 1 | 2  | 21.03  | 21.03   | -0.01 | 12.9  |             |
| 7  | 0 | 1 | 4  | 23.47  | 23.40   | 0.07  | 11.0  |             |
| 8  | 0 | 1 | 6  | 26.88  | 26.90   | -0.03 | 11.4  |             |
| 9  | 0 | 0 | 12 | 35.61  | 35.64   | -0.03 | 24.0  |             |
| 10 | 1 | 1 | 5  | 38.40  | 38.44   | -0.04 | 17.8  |             |

Compound:  $\text{LiAl}_2(\text{OH})_6 \cdot (3\text{-PA}) \cdot 0.6\text{Al}(\text{OH})_3 \cdot 3.5\text{H}_2\text{O}$   
 Cell: 5.0800 5.0800 30.9219 90.000 90.000 120.000  
 Space group: P63/M  
 Wavelength: 1.54180

| N  | h | k | l  | 2Thobs | 2Thcalc | Dif   | Iobs  | Explanation |
|----|---|---|----|--------|---------|-------|-------|-------------|
| 1  | 0 | 0 | 2  | 5.77   | 5.72    | 0.05  | 100.0 |             |
| 2  | 0 | 0 | 4  | 11.49  | 11.45   | 0.04  | 39.8  |             |
| 3  | 0 | 0 | 6  | 17.23  | 17.21   | 0.02  | 14.2  |             |
| 4  |   |   |    | 18.34  |         |       | 2.2   | Gibbsite    |
| 5  | 0 | 1 | 1  | 20.30  | 20.39   | -0.09 | 2.2   |             |
| 6  | 0 | 0 | 8  | 23.03  | 23.01   | 0.02  | 45.5  |             |
| 7  | 0 | 0 | 10 | 28.82  | 28.87   | -0.05 | 1.4   |             |
| 8  | 0 | 0 | 12 | 34.80  | 34.82   | -0.02 | 7.3   |             |
| 9  | 1 | 1 | 0  | 35.39  | 35.34   | 0.05  | 2.2   |             |
| 10 | 1 | 1 | 3  | 36.32  | 36.43   | -0.11 | 3.2   |             |
| 11 | 1 | 1 | 4  | 37.15  | 37.26   | -0.11 | 0.6   |             |
| 12 | 0 | 1 | 11 | 38.09  | 37.98   | 0.11  | 0.9   |             |
| 13 | 1 | 1 | 5  | 38.36  | 38.31   | 0.05  | 4.3   |             |

Compound:  $\text{LiAl}_2(\text{OH})_6 \cdot (4\text{-PA}) \cdot 0.2\text{Al}(\text{OH})_3 \cdot 3\text{H}_2\text{O}$   
 Cell: 5.0800 5.0800 29.6700 90.000 90.000 120.000  
 Space group: P63/M  
 Wavelength: 1.54180

| N | h | k | l | 2Thobs | 2Thcalc | Dif   | Iobs  |
|---|---|---|---|--------|---------|-------|-------|
| 1 | 0 | 0 | 2 | 6.01   | 5.96    | 0.05  | 100.0 |
| 2 | 0 | 0 | 4 | 11.99  | 11.93   | 0.06  | 39.7  |
| 3 | 0 | 0 | 6 | 18.02  | 17.94   | 0.08  | 17.9  |
| 4 | 0 | 1 | 1 | 20.30  | 20.41   | -0.11 | 2.7   |
| 5 | 0 | 0 | 8 | 24.08  | 23.99   | 0.09  | 41.8  |
| 6 | 1 | 1 | 3 | 36.46  | 36.52   | -0.07 | 15.6  |
| 7 | 1 | 1 | 5 | 38.43  | 38.56   | -0.13 | 5.8   |

Compound:  $\text{LiAl}_2(\text{OH})_6 \cdot (o\text{-TA}) \cdot 1.4\text{Al}(\text{OH})_3 \cdot 2.5\text{H}_2\text{O}$   
 Cell: 5.0801 5.0801 31.5000 90.000 90.000 120.000  
 Space group: P63/M  
 Wavelength: 1.54180

| N  | h | k | l  | 2Thobs | 2Thcalc | Dif   | Iobs  | Explanation |
|----|---|---|----|--------|---------|-------|-------|-------------|
| 1  | 0 | 0 | 2  | 5.61   | 5.61    | 0.00  | 100.0 |             |
| 2  | 0 | 0 | 4  | 11.22  | 11.24   | -0.02 | 143.0 |             |
| 3  | 0 | 0 | 6  | 16.88  | 16.89   | -0.01 | 41.4  |             |
| 4  |   |   |    | 18.29  |         |       | 79.7  | Gibbsite    |
| 5  | 0 | 1 | 0  | 20.21  | 20.18   | 0.03  | 3.4   |             |
| 6  | 0 | 0 | 8  | 22.59  | 22.58   | 0.01  | 68.2  |             |
| 7  | 0 | 1 | 4  | 23.18  | 23.16   | 0.02  | 13.9  |             |
| 8  | 0 | 0 | 10 | 28.26  | 28.33   | -0.07 | 4.1   |             |
| 9  | 1 | 1 | 2  | 35.70  | 35.81   | -0.11 | 4.4   |             |
| 10 | 1 | 1 | 4  | 37.25  | 37.19   | 0.06  | 22.0  |             |

Compound:  $\text{LiAl}_2(\text{OH})_6 \cdot (\text{m-TA}) \cdot 0.25\text{Al}(\text{OH})_3 \cdot 2.5\text{H}_2\text{O}$   
 Cell: 5.0800 5.0800 34.5000(Phase 1)/31.8155 (Phase 2) 90.000 90.000 120.000  
 Space group: P63/M  
 Wavelength: 1.54180

| N  | h | k | l | 2Thobs | 2Thcalc | Dif   | Iobs  | Explanation |
|----|---|---|---|--------|---------|-------|-------|-------------|
| 1  | 0 | 0 | 2 | 5.11   | 5.12    | -0.02 | 100.0 | Phase 1     |
| 2  | 0 | 0 | 2 | 5.50   | 5.56    | -0.05 | 28.9  | Phase 2     |
| 3  | 0 | 0 | 4 | 10.23  | 10.26   | -0.03 | 8.7   | Phase 1     |
| 4  | 0 | 0 | 4 | 11.10  | 11.12   | -0.02 | 16.6  | Phase 2     |
| 5  | 0 | 0 | 6 | 15.38  | 15.41   | -0.03 | 3.3   | Phase 1     |
| 6  | 0 | 0 | 6 | 16.75  | 16.72   | 0.03  | 6.8   | Phase 2     |
| 7  |   |   |   | 18.24  |         |       | 2.2   | Gibbsite    |
| 8  | 0 | 1 | 0 | 20.16  | 20.18   | -0.02 | 2.6   | Phase 1&2   |
| 9  | 0 | 0 | 8 | 20.64  | 20.60   | 0.05  | 5.5   | Phase 1     |
| 10 | 0 | 0 | 8 | 22.37  | 22.35   | 0.02  | 41.6  | Phase 2     |
| 11 | 1 | 1 | 2 | 35.94  | 35.80   | 0.14  | 10.1  | Phase 1&2   |
| 12 | 1 | 1 | 3 | 36.14  | 36.22   | -0.08 | 6.2   | Phase 1     |
| 13 | 1 | 1 | 5 | 38.21  | 38.15   | 0.06  | 8.6   | Phase 1&2   |
| 14 | 1 | 1 | 6 | 38.65  | 38.76   | -0.10 | 8.9   | Phase 1     |

Compound:  $\text{LiAl}_2(\text{OH})_6 \cdot (\text{p-TA}) \cdot 0.37\text{Al}(\text{OH})_3 \cdot 2.5\text{H}_2\text{O}$   
 Cell: 5.0839 5.0839 33.2708 90.000 90.000 120.000  
 Space group: P63/M  
 Wavelength: 1.54180

| N  | h | k | l  | 2Thobs | 2Thcalc | Dif   | Iobs  |
|----|---|---|----|--------|---------|-------|-------|
| 1  | 0 | 0 | 2  | 5.31   | 5.31    | -0.01 | 100.0 |
| 2  | 0 | 0 | 4  | 10.62  | 10.64   | -0.02 | 32.0  |
| 3  | 0 | 0 | 6  | 15.93  | 15.98   | -0.06 | 8.3   |
| 4  | 0 | 1 | 1  | 20.31  | 20.35   | -0.04 | 1.9   |
| 5  | 0 | 1 | 2  | 20.91  | 20.87   | 0.04  | 6.0   |
| 6  | 0 | 0 | 8  | 21.31  | 21.37   | -0.06 | 25.3  |
| 7  | 0 | 0 | 10 | 26.70  | 26.80   | -0.09 | 9.8   |
| 8  | 0 | 0 | 12 | 32.19  | 32.29   | -0.10 | 1.2   |
| 9  | 1 | 1 | 1  | 35.43  | 35.42   | 0.01  | 0.6   |
| 10 | 1 | 1 | 3  | 36.23  | 36.26   | -0.02 | 2.3   |
| 11 | 0 | 0 | 14 | 37.73  | 37.86   | -0.12 | 6.7   |
| 12 | 0 | 1 | 12 | 38.24  | 38.37   | -0.13 | 0.7   |
| 13 | 0 | 1 | 12 | 38.44  | 38.37   | 0.07  | 1.7   |
